# Supplementary material for: Novel standards in the measurement of rat insulin granules combining electron microscopy, high-content image analysis and in silico modelling
Source: PubMed Central journal article supplement — Diabetologia. 2012 Jan 18;55(4):1013–23. doi: 10.1007/s00125-011-2438-4 (PMC3296007; doi:10.1007/s00125-011-2438-4), 2012-01-18
Supplement: 125_2011_2438_MOESM10_ESM.pdf [file 125_2011_2438_MOESM10_ESM.pdf]

**ESM Table 1: Protocol for freeze substitution of HPF samples**

| <b>Step</b> | <b>T start (°C)</b> | <b>T end (°C)</b> | <b>Time (hr)</b> | <b>Reagent</b> | <b>Concentration</b>                                     |
|-------------|---------------------|-------------------|------------------|----------------|----------------------------------------------------------|
| 1           | -90                 | -90               | 5                | cocktail       | 1% osmium tetroxide, 0.1% uranyl acetate in pure acetone |
| 2           | -90                 | 0                 | 18               | cocktail       | 1% osmium tetroxide, 0.1% uranyl acetate in pure acetone |
| 3           | 0                   | 0                 | 0.2              | Acetone        | 100%                                                     |
| 4           | 0                   | 0                 | 0.2              | Acetone        | 100%                                                     |
| 5           | 0                   | 0                 | 0.2              | Acetone        | 100%                                                     |
| 6           | RT                  | RT                | 2                | Epon:Acetone   | 1:3                                                      |
| 7           | RT                  | RT                | 2                | Epon:Acetone   | 1:1                                                      |
| 8           | RT                  | RT                | 2                | Epon:Acetone   | 3:1                                                      |
| 9           | RT                  | RT                | 2                | Epon           | 100%                                                     |
| 10          | 60                  | 60                | 24-48            | Epon           | 100%                                                     |
