# Supplementary material for: Novel standards in the measurement of rat insulin granules combining electron microscopy, high-content image analysis and in silico modelling
Source: PubMed Central journal article supplement — Diabetologia. 2012 Jan 18;55(4):1013–23. doi: 10.1007/s00125-011-2438-4 (PMC3296007; doi:10.1007/s00125-011-2438-4), 2012-01-18
Supplement: 125_2011_2438_MOESM11_ESM.pdf [file 125_2011_2438_MOESM11_ESM.pdf]

**ESM Table 2: ISG counting in TEM images of HPF and chemically fixed beta cells**

| <b>Fixation</b> | <b>n</b> | <b>Total ISG</b> | <b>ISG<sup>[Halo-]</sup></b> | <b>% ISG<sup>[Halo-]</sup></b> | <b>ISG<sup>[Halo+]</sup></b> | <b>% ISG<sup>[Halo+]</sup></b> |
|-----------------|----------|------------------|------------------------------|--------------------------------|------------------------------|--------------------------------|
| HPF1            | 35       | 3625             | 3394                         | 93.63                          | 231                          | 6.37                           |
| HPF2            | 29       | 2952             | 1997                         | 67.65                          | 955                          | 32.35                          |
| Chemical1       | 33       | 2751             | 1209                         | 43.95                          | 1542                         | 56.05                          |
| Chemical2       | 36       | 3262             | 946                          | 29.00                          | 2316                         | 71.00                          |

The results of the two independent section series for both fixation methods provided in Table 1 are shown separately here.
