# Supplementary material for: Novel standards in the measurement of rat insulin granules combining electron microscopy, high-content image analysis and in silico modelling
Source: PubMed Central journal article supplement — Diabetologia. 2012 Jan 18;55(4):1013–23. doi: 10.1007/s00125-011-2438-4 (PMC3296007; doi:10.1007/s00125-011-2438-4), 2012-01-18
Supplement: 125_2011_2438_MOESM13_ESM.pdf [file 125_2011_2438_MOESM13_ESM.pdf]

**ESM Table 4: Comparison of data concerning beta cells morphometry from selected publications**

|                         | <b>Straub et al.<br/>(2004)</b> | <b>Dean PM<br/>(1973)</b>                  | <b>Olofsson et al. (2002)</b>  | <b>Sato and Herman (1981)</b> |
|-------------------------|---------------------------------|--------------------------------------------|--------------------------------|-------------------------------|
| <b>Species</b>          | Rat                             | Mouse                                      | Mouse                          | Rabbit                        |
| <b>Fixation</b>         | CHEM                            | CHEM                                       | CHEM                           | CHEM                          |
| <b>Analyzed Cells</b>   | 11                              | 342                                        | 57                             | N.A.                          |
| <b>Cell Volume</b>      | 1202                            | 1434 $\mu\text{m}^3$                       | 1376 $\pm$ 84 $\mu\text{m}^3$  | 1260 $\mu\text{m}^3$          |
| <b>Cell surface</b>     | N.A.                            | 973 $\mu\text{m}^2$                        | N.A.                           | 600 $\mu\text{m}^2$           |
| <b>Cell Diameter</b>    | 13.2 $\mu\text{m}$              | 11.3 $\mu\text{m}$ - 12.7 $\mu\text{m}$    | N.A.                           | N.A.                          |
| <b>Nuclear Volume</b>   | N.A.                            | 168 $\mu\text{m}^3$                        | N.A.                           | 168 $\mu\text{m}^3$           |
| <b>Cytoplasm Volume</b> | N.A.                            | 1266 $\mu\text{m}^3$                       | N.A.                           | 1092 $\mu\text{m}^3$          |
| <b>ISGs OMD</b>         | 348 nm                          | 289 nm                                     | 357 $\pm$ 11 nm                | 304 $\pm$ 48 nm               |
| <b>ISGs Volume</b>      | 0.022 $\mu\text{m}^3$           | 0.012 $\mu\text{m}^3$                      | N.A.                           | N.A.                          |
| <b>ISGs Density</b>     | N.A.                            | 0.0808 x 10 <sup>13</sup> /cm <sup>3</sup> | 6.4 $\pm$ 0.4/ $\mu\text{m}^3$ | N.A.                          |
| <b>ISGs/Cell</b>        | 11136                           | 13060                                      | 8800 $\pm$ 600                 | 9200                          |
