# Supplementary figures and images for: Novel standards in the measurement of rat insulin granules combining electron microscopy, high-content image analysis and in silico modelling
Source: PubMed Central journal article supplement — Diabetologia. 2012 Jan 18;55(4):1013–23. doi: 10.1007/s00125-011-2438-4 (PMC3296007; doi:10.1007/s00125-011-2438-4), 2012-01-18

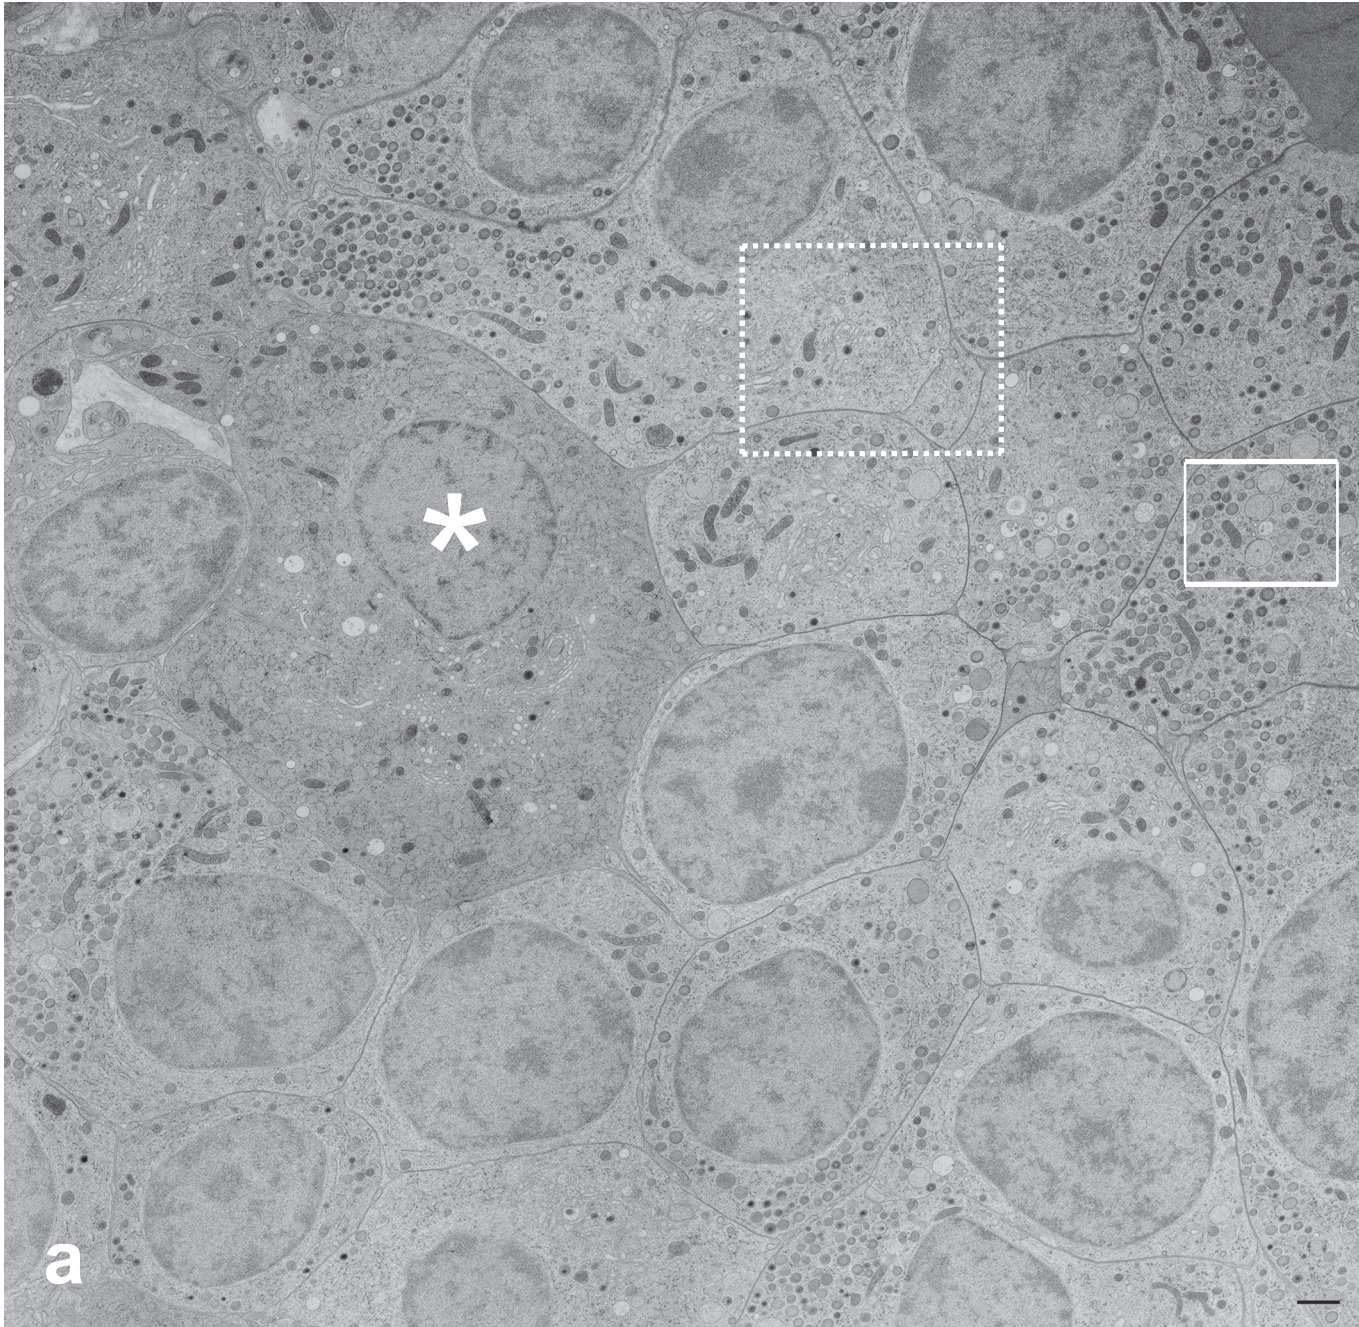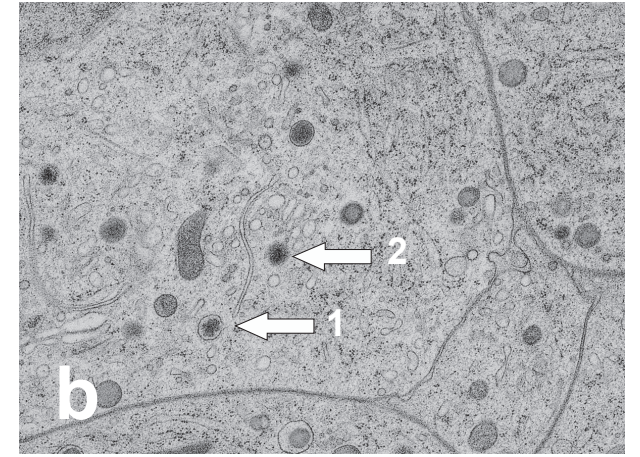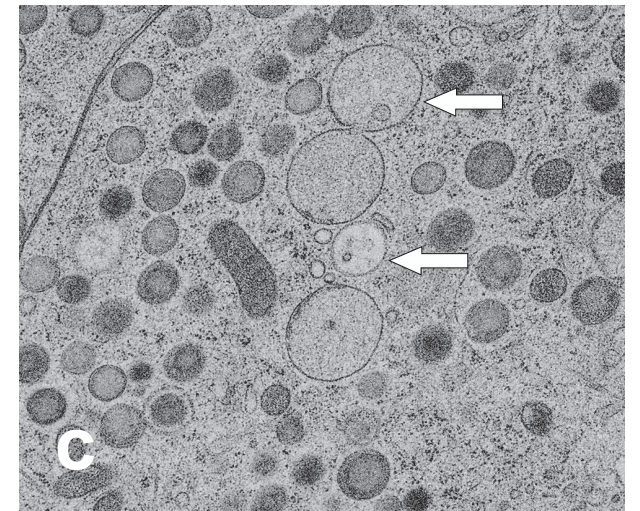

ESM Fig. 1

Supplement: 125_2011_2438_MOESM1_ESM.pdf [file 125_2011_2438_MOESM1_ESM.pdf]

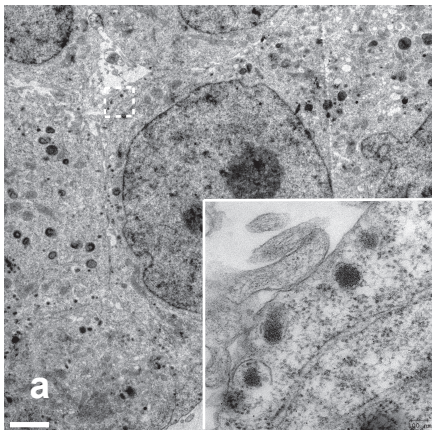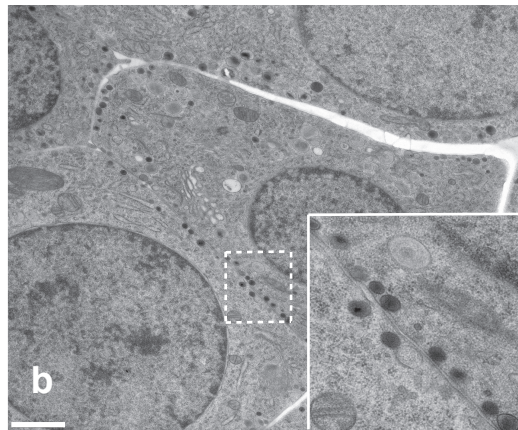

ESM Fig. 2

Supplement: 125_2011_2438_MOESM2_ESM.pdf [file 125_2011_2438_MOESM2_ESM.pdf]

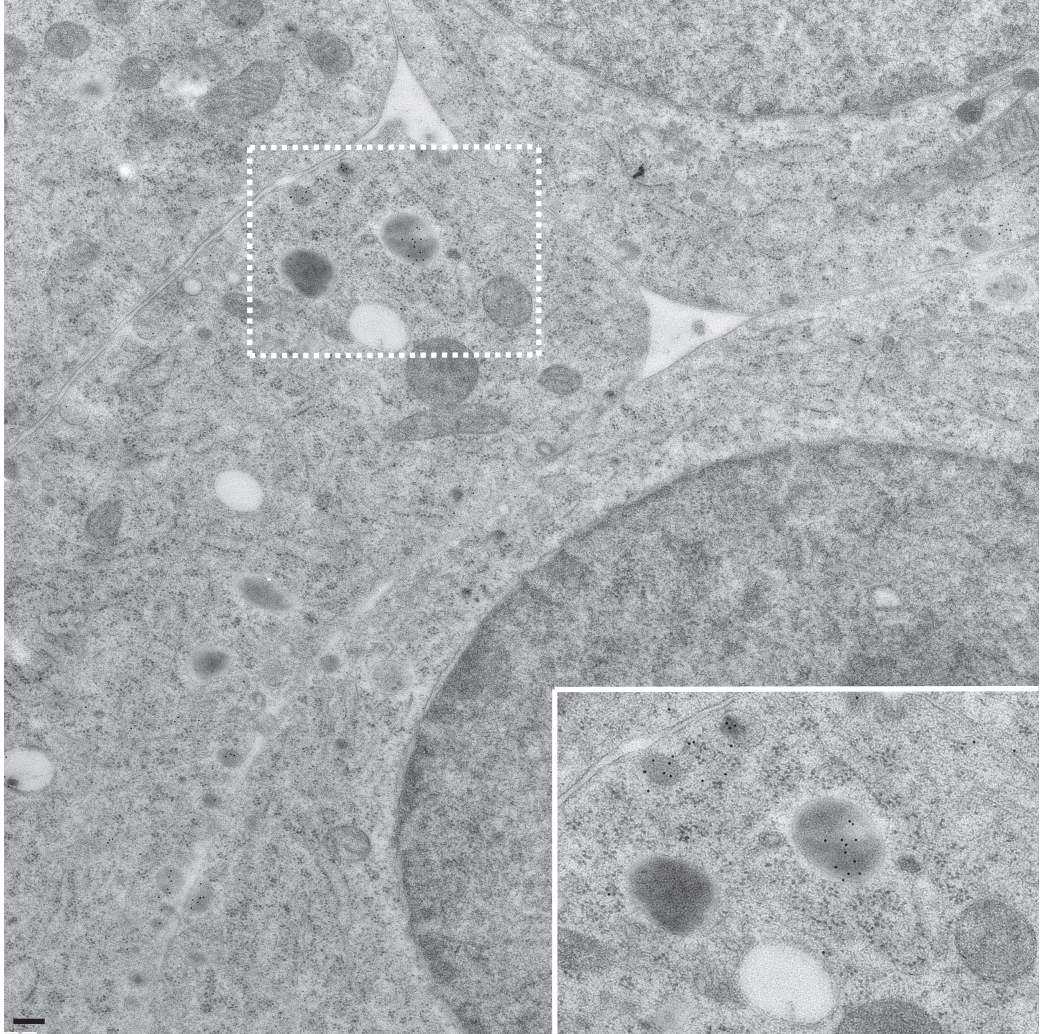

ESM Fig. 3

Supplement: 125_2011_2438_MOESM3_ESM.pdf [file 125_2011_2438_MOESM3_ESM.pdf]

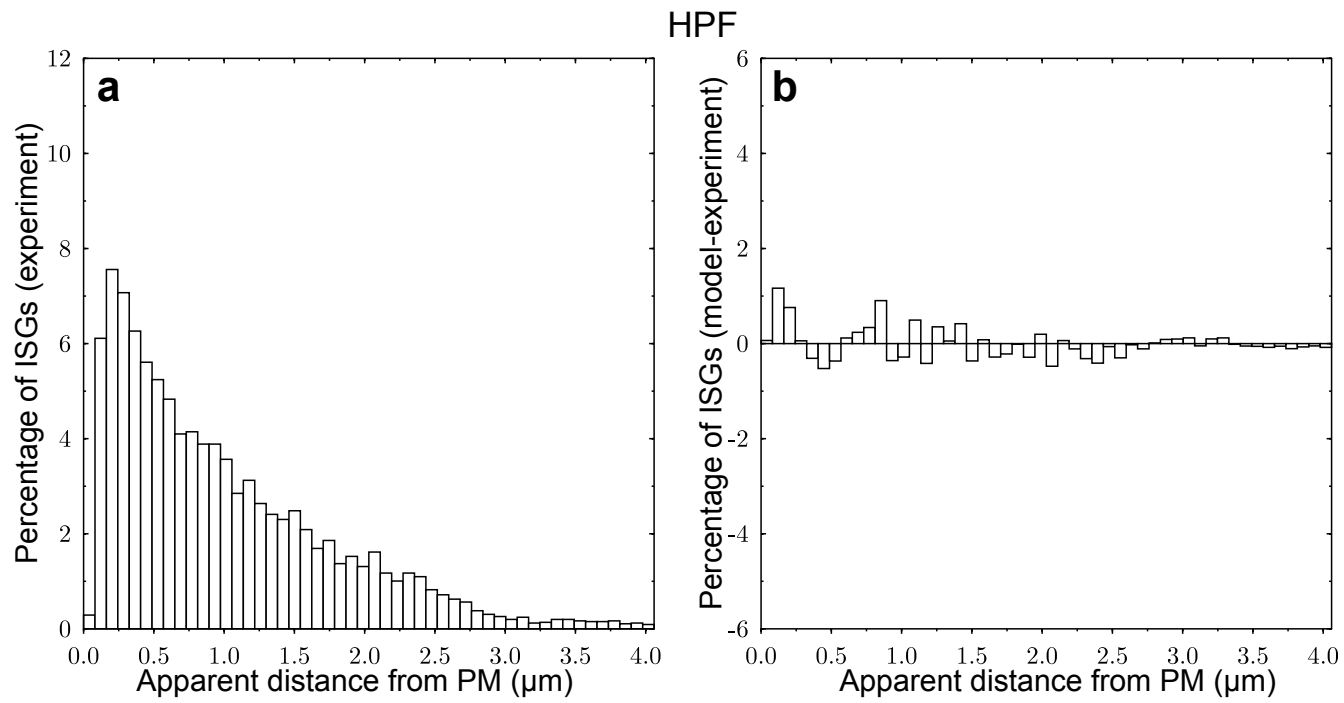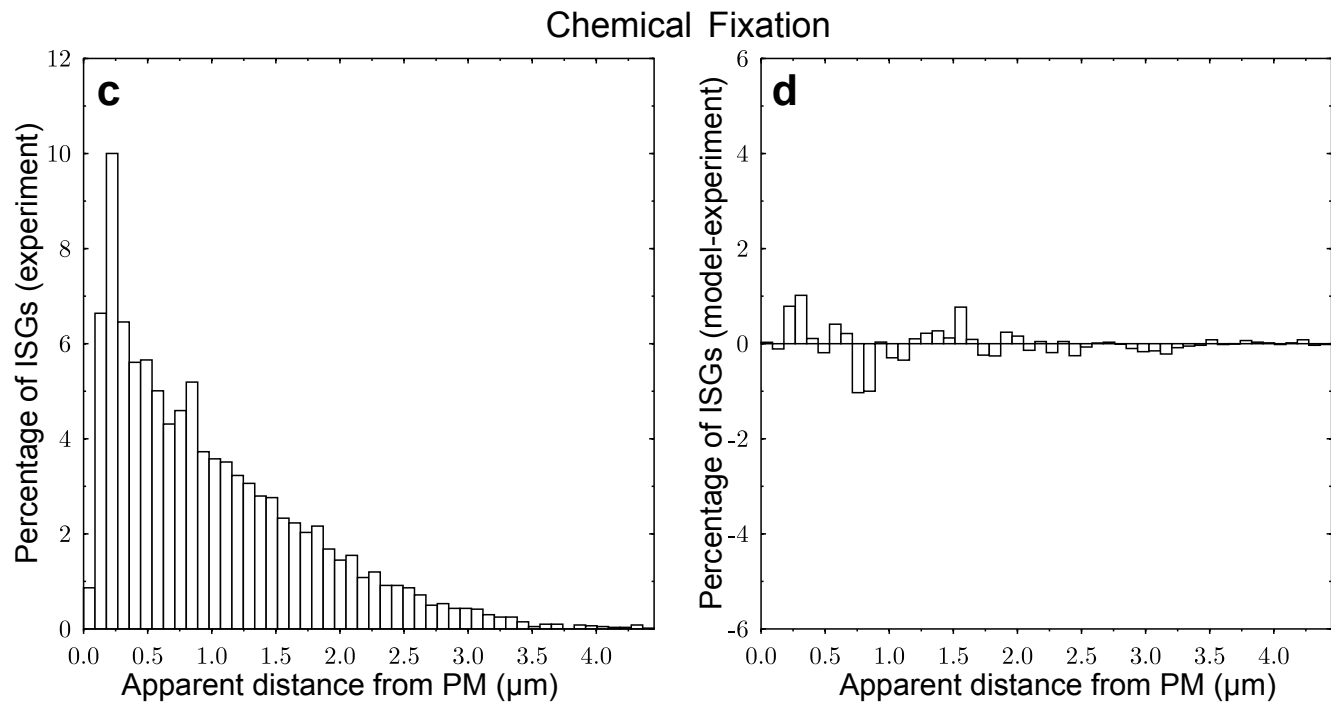

Supplement: 125_2011_2438_MOESM7_ESM.pdf [file 125_2011_2438_MOESM7_ESM.pdf]

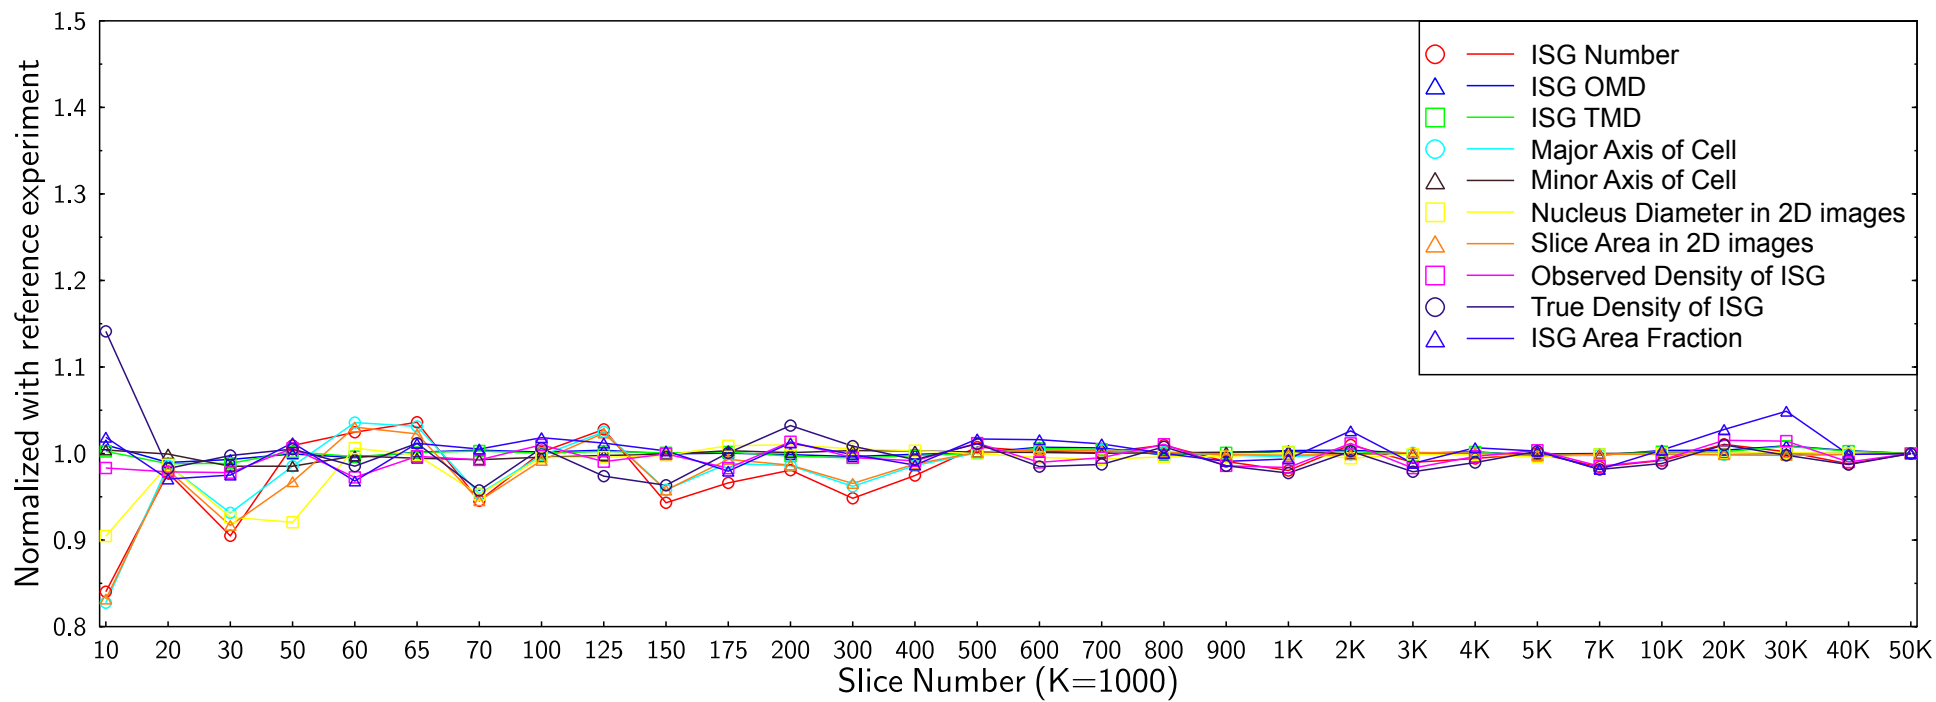

ESM Fig. 9

Supplement: 125_2011_2438_MOESM9_ESM.pdf [file 125_2011_2438_MOESM9_ESM.pdf]
